# Supplementary material for: Complaints, Complainants, and Rulings Regarding Drug Promotion in the United Kingdom and Sweden 2004–2012: A Quantitative and Qualitative Study of Pharmaceutical Industry Self-Regulation
Source: PubMed Central journal article supplement (PMC4331559; doi:10.1371/journal.pmed.1001785), 2015-02-17
Supplement: pmed.1001785.s002.pdf [file pmed.1001785.s002.pdf]

**Table S1. UK rulings of breach 2004-2012: complete list of clauses**

| §  | Description                                                                                                 | All breaches<br>n=1950 <sup>a</sup> | All cases<br>n=597 <sup>b</sup> | Serious cases<br>n=100 <sup>c</sup> |
|----|-------------------------------------------------------------------------------------------------------------|-------------------------------------|---------------------------------|-------------------------------------|
| 1  | Scope of code and definitions                                                                               | 5 (0.3%)                            | 5 (0.8%)                        | 3 (3.0%)                            |
| 2  | Discredit and confidence                                                                                    | 102 (5.2%)                          | 92 (15%)                        | 92 (92%)                            |
| 3  | Marketing authorization                                                                                     | 113 (5.8%)                          | 88 (15%)                        | 20 (20%)                            |
| 4  | Prescribing information and other<br>obligatory information                                                 | 64 (3.3%)                           | 45 (7.5%)                       | 9 (9.0%)                            |
| 5  | Abbreviated advertisements                                                                                  | 1 (0.1%)                            | 1 (0.2%)                        | 0                                   |
| 6  | Journal advertising                                                                                         | 2 (0.1%)                            | 2 (0.3%)                        | 0                                   |
| 7  | Information, claims and comparisons                                                                         | 1021 (52%)                          | 280 (47%)                       | 28 (28%)                            |
| 8  | Disparaging references                                                                                      | 33 (1.7%)                           | 27 (4.5%)                       | 5 (5.0%)                            |
| 9  | High standards; format; suitability and<br>causing offence; sponsorship                                     | 249 (13%)                           | 210 (35%)                       | 77 (77%)                            |
| 10 | Reprints and quotations                                                                                     | 3 (0.2%)                            | 3 (0.5%)                        | 0                                   |
| 11 | Distribution of promotional material                                                                        | 3 (0.2%)                            | 2 (0.3%)                        | 0                                   |
| 12 | Disguised promotion                                                                                         | 32 (1.6%)                           | 25 (4.2%)                       | 9 (9.0%)                            |
| 13 | Non-interventional studies                                                                                  | 0                                   | 0                               | 0                                   |
| 14 | Certification                                                                                               | 16 (0.8%)                           | 13 (2.2%)                       | 4 (4.0%)                            |
| 15 | Representatives                                                                                             | 96 (4.9%)                           | 81 (14%)                        | 15 (15%)                            |
| 16 | Training                                                                                                    | 5 (0.3%)                            | 4 (0.7%)                        | 0                                   |
| 17 | Provision of medicines and samples                                                                          | 2 (0.1%)                            | 2 (0.3%)                        | 0                                   |
| 18 | Items for patients; promotional aids;<br>provision of goods and services;<br>agreements to benefit patients | 37 (1.9%)                           | 35 (5.9%)                       | 15 (15%)                            |
| 19 | Meetings, hospitality and sponsorship                                                                       | 36 (1.8%)                           | 30 (5.0%)                       | 17 (17%)                            |
| 20 | Consultants                                                                                                 | 2 (0.1%)                            | 2 (0.3%)                        | 2 (2.0%)                            |
| 21 | Scientific services                                                                                         | 0                                   | 0                               | 0                                   |
| 22 | Relations with the public and media                                                                         | 84 (4.3%)                           | 55 (9.2%)                       | 13 (13%)                            |
| 23 | Relations with patient organizations                                                                        | 3 (0.2%)                            | 2 (0.3%)                        | 1 (1.0%)                            |
| 24 | Internet                                                                                                    | 3 (0.2%)                            | 1 (0.2%)                        | 0                                   |
| 25 | Compliance with undertakings                                                                                | 38 (1.9%)                           | 33 (5.5%)                       | 25 (25%)                            |

<sup>a</sup> Percentages indicate cell portion of total breaches. E.g. 5.2% of breaches pertained to §2.

<sup>b</sup> Percentages indicate cell portion of total cases. E.g. 15% of cases involved one or more §2 ruling.

<sup>c</sup> Percentages indicate cell portion of total serious violation cases. E.g. 92% of serious violation cases involved one or more §2 ruling.
