# Supplementary material for: Complaints, Complainants, and Rulings Regarding Drug Promotion in the United Kingdom and Sweden 2004–2012: A Quantitative and Qualitative Study of Pharmaceutical Industry Self-Regulation
Source: PubMed Central journal article supplement (PMC4331559; doi:10.1371/journal.pmed.1001785), 2015-02-17
Supplement: pmed.1001785.s003.pdf [file pmed.1001785.s003.pdf]

**Table S2. Sweden rulings of breach 2004-2012: complete list of clauses**

| §     | Description                                                            | All breaches<br>n=972 <sup>a</sup> | All cases<br>n=536 <sup>b</sup> | Serious cases<br>n=101 <sup>c</sup> |
|-------|------------------------------------------------------------------------|------------------------------------|---------------------------------|-------------------------------------|
| 1     | General principles: marketing to health professionals                  | 6 (0.6%)                           | 6 (1.1%)                        | 6 (5.9%)                            |
| 2     | Marketing authorization                                                | 156 (16%)                          | 156 (29%)                       | 50 (49%)                            |
| 3     | High standards, good taste and causing offence                         | 4 (0.4%)                           | 4 (0.7%)                        | 1 (1.0%)                            |
| 4     | Information, claims and comparisons                                    | 250 (26%)                          | 250 (47%)                       | 67 (66%)                            |
| 5     | Disguised promotion and disclosure                                     | 7 (0.7%)                           | 7 (1.3%)                        | 1 (1.0%)                            |
| 6     | Information on publication year or date                                | 2 (0.2%)                           | 2 (0.4%)                        | 1 (1.0%)                            |
| 7     | Information must be up-to-date                                         | 2 (0.2%)                           | 2 (0.4%)                        | 1 (1.0%)                            |
| 8     | Documentation and references – of high scientific standards            | 14 (1.4%)                          | 14 (2.6%)                       | 4 (4.0%)                            |
| 9     | Documentation and references – applicability                           | 2 (0.2%)                           | 2 (0.4%)                        | 1 (1.0%)                            |
| 10    | Documentation and references – sources cited                           | 18 (1.9%)                          | 18 (3.4%)                       | 4 (4.0%)                            |
| 11    | Documentation and references – fair and balanced presentation          | 62 (6.4%)                          | 62 (12%)                        | 22 (22%)                            |
| 12    | Comparisons                                                            | 64 (6.6%)                          | 64 (12%)                        | 22 (22%)                            |
| 13    | Disparaging references and discreditation                              | 8 (0.8%)                           | 8 (1.5%)                        | 2 (2.0%)                            |
| 14    | Rules on disseminating promotional information                         | 0                                  | 0                               | 0                                   |
| 15    | Rules on disseminating important information                           | 1 (0.1%)                           | 1 (0.2%)                        | 1 (1.0%)                            |
| 16    | Rules regarding the form of the information                            | 0                                  | 0                               | 0                                   |
| 17    | Prescribing information and other obligatory information               | 37 (3.8%)                          | 37 (6.9%)                       | 6 (5.9%)                            |
| 18    | Prescribing information and other obligatory information               | 0                                  | 0                               | 0                                   |
| 19    | Legibility of reproduced SPC or catalogue text                         | 10 (1.0%)                          | 10 (1.9%)                       | 0                                   |
| 20    | Format and size of printed material                                    | 0                                  | 0                               | 0                                   |
| 21    | Verbal information – definition and aims                               | 0                                  | 0                               | 0                                   |
| 22    | Verbal information – conduct of representatives                        | 1 (0.1%)                           | 1 (0.2%)                        | 0                                   |
| 23    | Verbal information – timely notification of recipient                  | 2 (0.2%)                           | 2 (0.4%)                        | 0                                   |
| 24    | Verbal information – hospitality and compensations                     | 1 (0.1%)                           | 1 (0.2%)                        | 0                                   |
| 25    | Verbal information – information on addressees, their right to comment | 0                                  | 0                               | 0                                   |
| 26    | Drug samples                                                           | 0                                  | 0                               | 0                                   |
| 27    | Rules on responsibility                                                | 2 (0.2%)                           | 2 (0.4%)                        | 0                                   |
| 28    | Bearer of responsibility                                               | 4 (0.4%)                           | 4 (0.7%)                        | 0                                   |
| 29    | Liaison officer                                                        | 0                                  | 0                               | 0                                   |
| 30    | Burden of proof                                                        | 0                                  | 0                               | 0                                   |
| 31    | Statutory copies                                                       | 1 (0.1%)                           | 1 (0.2%)                        | 0                                   |
| 32-42 | Agreement on relations with healthcare sector                          | 54 (5.6%)                          | 54 (10%)                        | 0                                   |
| 43-56 | Rules on non-interventional studies                                    | 0                                  | 0                               | 0                                   |
| 57    | Criteria for providing financial support to National Quality Registers | 0                                  | 0                               | 0                                   |

**Table S2. Cont'd: Sweden rulings of breach 2004-2012: complete list of clauses**

|     |                                                                         |           |           |          |
|-----|-------------------------------------------------------------------------|-----------|-----------|----------|
| 101 | General principles: marketing to the public                             | 4 (0.4%)  | 4 (0.7%)  | 1 (1.0%) |
| 102 | Marketing to the public: Marketing authorization                        | 100 (10%) | 100 (19%) | 18 (18%) |
| 103 | Marketing to the public: High standards, good taste and causing offence | 8 (0.8%)  | 8 (1.5%)  | 3 (3.0%) |
| 104 | Marketing to the public: Information, claims and comparisons            | 73 (7.5%) | 73 (14%)  | 14 (14%) |
| 105 | Marketing to the public: Disguised promotion and disclosure             | 17 (1.8%) | 17 (3.2%) | 2 (2.0%) |
| 106 | Marketing to the public: Information on publication year or date        | 1 (0.1%)  | 1 (0.2%)  | 0        |
| 107 | Marketing to the public: Information must be up-to-date                 | 2 (0.2%)  | 2 (0.4%)  | 2 (2.0%) |
| 108 | Marketing to the public: Documentation and references (see §8)          | 6 (0.6%)  | 6 (1.1%)  | 0        |
| 109 | Marketing to the public: Documentation and references (see §9)          | 0         | 0         | 0        |
| 110 | Marketing to the public: Documentation and references (see §10)         | 1 (0.1%)  | 1 (0.2%)  | 0        |
| 111 | Marketing to the public: Documentation and references (see §11)         | 1 (0.1%)  | 1 (0.2%)  | 1 (1.0%) |
| 112 | Marketing to the public: Comparisons                                    | 4 (0.4%)  | 4 (0.7%)  | 0        |
| 113 | Marketing to the public: Disparaging references and discreditation      | 2 (0.2%)  | 2 (0.4%)  | 0        |
| 114 | Marketing to the public: Rules on disseminating promotional information | 0         | 0         | 0        |
| 115 | Marketing to the public: Rules on disseminating important information   | 1 (0.1%)  | 1 (0.2%)  | 0        |
| 116 | Marketing to the public: Rules regarding the form of the information    | 0         | 0         | 0        |
| 117 | Marketing to the public: Instructions and obligatory information        | 39 (4.0%) | 39 (7.3%) | 0        |
| 119 | Marketing to the public: Legibility                                     | 5 (0.5%)  | 5 (0.9%)  | 0        |
| 120 | Marketing to the public: Format and size of printed material            | 0         | 0         | 0        |
| 127 | Marketing to the public: Rules on responsibility                        | 0         | 0         | 0        |
| 128 | Marketing to the public: Bearer of responsibility                       | 0         | 0         | 0        |
| 129 | Marketing to the public: Liaison officer                                | 0         | 0         | 0        |
| 130 | Marketing to the public: Burden of proof                                | 0         | 0         | 0        |
| 131 | Marketing to the public: Statutory copies                               | 0         | 0         | 0        |

<sup>a</sup> Percentages indicate cell portion of total breaches. E.g. 16% of breaches pertained to §2.

<sup>b</sup> Percentages indicate cell portion of total cases. E.g. 29% of cases involved one or more §2 ruling.

<sup>c</sup> Percentages indicate cell portion of total serious violation cases. E.g. 49% of serious violation cases involved one or more §2 ruling.
