# Supplementary material for: Complaints, Complainants, and Rulings Regarding Drug Promotion in the United Kingdom and Sweden 2004–2012: A Quantitative and Qualitative Study of Pharmaceutical Industry Self-Regulation
Source: PubMed Central journal article supplement (PMC4331559; doi:10.1371/journal.pmed.1001785), 2015-02-17
Supplement: pmed.1001785.s004.pdf [file pmed.1001785.s004.pdf]

**Table S3. Serious violation rulings in the UK and Sweden 2004-2012: companies**

| <b>Company<sup>a</sup></b> | <b>UK n=110<sup>b</sup></b> | <b>SWE n=101</b> | <b>Total n=211</b> |
|----------------------------|-----------------------------|------------------|--------------------|
| Abbott                     | 4 (3.6%)                    | 4 (4.0%)         | 8 (3.8%)           |
| Alcon                      | 0                           | 1 (1.0%)         | 1 (0.5%)           |
| Allergan                   | 7 (6.4%)                    | 0                | 7 (3.3%)           |
| Amgen                      | 0                           | 3 (3.0%)         | 3 (1.4%)           |
| ApoPharma                  | 1 (0.9%)                    | 0                | 1 (0.5%)           |
| Astellas                   | 1 (0.9%)                    | 5 (5.0%)         | 6 (2.8%)           |
| AstraZeneca                | 6 (5.5%)                    | 5 (5.0%)         | 11 (5.2%)          |
| Baxter                     | 0                           | 1 (1.0%)         | 1 (0.5%)           |
| Bayer                      | 7 (6.4%)                    | 9 (7.9%)         | 16 (7.6%)          |
| Biogen Idec                | 0                           | 1 (1.0%)         | 1 (0.5%)           |
| Boehringer Ingelheim       | 4 (3.6%)                    | 3 (3.0%)         | 7 (3.3%)           |
| Bristol-Myers Squibb       | 1 (0.9%)                    | 0                | 1 (0.5%)           |
| Chiesi                     | 2 (1.8%)                    | 0                | 2 (0.9%)           |
| Daiichi Sankyo             | 3 (2.7%)                    | 0                | 3 (1.4%)           |
| Eli Lilly                  | 7 (6.4%)                    | 4 (4.0%)         | 11 (5.2%)          |
| Ferring                    | 1 (0.9%)                    | 1 (1.0%)         | 2 (0.9%)           |
| GlaxoSmithKline            | 7 (6.4%)                    | 6 (5.9%)         | 13 (6.1%)          |
| Grünenthal                 | 3 (2.7%)                    | 0                | 3 (1.4%)           |
| Janssen-Cilag              | 2 (1.8%)                    | 3 (3.0%)         | 5 (2.4%)           |
| Johnson & Johnson          | 0                           | 4 (4.0%)         | 4 (1.9%)           |
| Leo Pharma                 | 0                           | 1 (1.0%)         | 1 (0.5%)           |
| Lundbeck                   | 0                           | 3 (4.0%)         | 3 (1.4%)           |
| Menarini                   | 1 (0.9%)                    | 0                | 1 (0.5%)           |
| Merck KGaA                 | 3 (2.7%)                    | 2 (2.0%)         | 5 (1.9%)           |
| Merck Sharp & Dohme        | 3 (2.7%)                    | 4 (4.0%)         | 7 (3.3%)           |
| Merz                       | 2 (1.8%)                    | 0                | 2 (0.9%)           |
| Mundipharma                | 0                           | 2 (2.0%)         | 2 (0.9%)           |
| Napp                       | 2 (1.8%)                    | 0                | 2 (0.9%)           |
| Novartis                   | 1 (0.9%)                    | 11 (11%)         | 12 (5.7%)          |
| Novo Nordisk               | 7 (6.4%)                    | 5 (5.0%)         | 12 (5.7%)          |
| Orion                      | 1 (0.9%)                    | 0                | 1 (0.5%)           |
| Otsuka                     | 1 (0.9%)                    | 0                | 1 (0.5%)           |
| Pfizer                     | 10 (9.0%)                   | 9 (8.9%)         | 19 (9.0%)          |
| ProStrakan                 | 2 (1.8%)                    | 0                | 2 (0.9%)           |
| Recip                      | 0                           | 2 (2.0%)         | 2 (0.9%)           |
| Roche                      | 6 (5.4%)                    | 2 (2.0%)         | 8 (3.8%)           |
| Sanofi                     | 2 (1.8%)                    | 6 (5.9%)         | 8 (3.8%)           |
| SBL Vaccin                 | 0                           | 1 (1.0%)         | 1 (0.5%)           |
| Servier                    | 1 (0.9%)                    | 0                | 1 (0.5%)           |
| Shire                      | 2 (1.8%)                    | 0                | 2 (0.9%)           |
| Solvay                     | 1 (0.9%)                    | 0                | 1 (0.5%)           |
| Takeda                     | 4 (3.6%)                    | 3 (3.0%)         | 7 (3.3%)           |

**Table S3 cont'd. Serious violation rulings in the UK and Sweden 2004-2012: companies**

|                 |          |   |          |
|-----------------|----------|---|----------|
| Teva            | 3 (2.7%) | 0 | 3 (1.4%) |
| UCB             | 1 (0.9%) | 0 | 1 (0.5%) |
| Vifor           | 4 (3.6%) | 0 | 4 (1.9%) |
| Warner Chilcott | 3 (2.7%) | 0 | 3 (1.4%) |

<sup>a</sup> List based on existing companies. In cases where companies merged with or were acquired by another company subsequent to the violation ruling (e.g. Wyeth by Pfizer; Nycomed by Takeda) we assigned the breach to the existing company (i.e. Pfizer and Takeda, respectively). In cases where the violation was by a subsidiary company (e.g. McNeil) we assigned the breach to the parent company (i.e. Johnson & Johnson).

<sup>b</sup> A few cases involved multiple companies or multiple §2 breaches.
