# Supplementary material for: Complaints, Complainants, and Rulings Regarding Drug Promotion in the United Kingdom and Sweden 2004–2012: A Quantitative and Qualitative Study of Pharmaceutical Industry Self-Regulation
Source: PubMed Central journal article supplement (PMC4331559; doi:10.1371/journal.pmed.1001785), 2015-02-17
Supplement: pmed.1001785.s005.pdf [file pmed.1001785.s005.pdf]

**Table S4. Serious violation rulings in the UK and Sweden 2004-2012: promoted drugs**

| <b>Therapeutic class by ATC Code</b>               | <b>UK<sup>a</sup> n=110</b> | <b>SWE n=101</b> | <b>Total n=211</b> |
|----------------------------------------------------|-----------------------------|------------------|--------------------|
| <b>A02</b> Drugs for acid related disorders        | 3 (2.7%)                    | 3 (3.0%)         | 6 (2.8%)           |
| <b>A07</b> Antidiarrheals                          | 1 (0.9%)                    | 0                | 1 (0.5%)           |
| <b>A08</b> Antiobesity preparations                | 4 (3.6%)                    | 4 (4.0%)         | 8 (3.8%)           |
| <b>A10</b> Drugs used in diabetes                  | 15 (14%)                    | 6 (5.9%)         | 21 (10%)           |
| <b>A11</b> Vitamins                                | 0                           | 1 (1.0%)         | 1 (0.5%)           |
| <b>A12</b> Mineral supplements                     | 1 (0.9%)                    | 0                | 1 (0.5%)           |
| <b>A16</b> Other alim. tract and metabol. products | 1 (0.9%)                    | 0                | 1 (0.5%)           |
| <b>B01</b> Antithrombotic agents                   | 4 (3.6%)                    | 1 (1.0%)         | 5 (2.4%)           |
| <b>B02</b> Antihemorrhagics                        | 0                           | 1 (1.0%)         | 1 (0.5%)           |
| <b>B03</b> Antianemic preparations                 | 4 (3.6%)                    | 1 (1.0%)         | 5 (2.4%)           |
| <b>C01</b> Cardiac therapy                         | 0                           | 1 (1.0%)         | 1 (0.5%)           |
| <b>C05</b> Vasoprotectives                         | 1 (0.9%)                    | 0                | 1 (0.5%)           |
| <b>C07</b> Beta blocking agents                    | 1 (0.9%)                    | 0                | 1 (0.5%)           |
| <b>C09</b> Agents act. on renin-angiotensin syst.  | 3 (2.7%)                    | 6 (5.9%)         | 9 (4.3%)           |
| <b>C10</b> Lipid modifying agent                   | 8 (7.2%)                    | 0                | 8 (3.8%)           |
| <b>D03</b> Prepar. for treatment of wounds/ulcers  | 0                           | 1 (1.0%)         | 1 (0.5%)           |
| <b>D10</b> Anti-acne preparations                  | 1 (0.9%)                    | 0                | 1 (0.5%)           |
| <b>D11</b> Other dermatological preparations       | 0                           | 1 (1.0%)         | 1 (0.5%)           |
| <b>G03</b> Sex horm. and modul. of genital syst.   | 3 (2.7%)                    | 6 (5.9%)         | 9 (4.3%)           |
| <b>G04</b> Urologicals                             | 6 (5.5%)                    | 13 (13%)         | 19 (9.0%)          |
| <b>J01</b> Antibacterials for systemic use         | 0                           | 1 (1.0%)         | 1 (0.5%)           |
| <b>J02</b> Antimycotics for systemic use           | 2 (1.8%)                    | 1 (1.0%)         | 3 (1.4%)           |
| <b>J06</b> Immune sera and immunoglobulins         | 0                           | 1 (1.0%)         | 1 (0.5%)           |
| <b>J07</b> Vaccines                                | 1 (0.9%)                    | 6 (5.9%)         | 7 (3.3%)           |
| <b>L01</b> Antineoplastic agents                   | 4 (3.6%)                    | 5 (5.0%)         | 9 (4.3%)           |
| <b>L02</b> Endocrine therapy                       | 2 (1.8%)                    | 0                | 2 (0.9%)           |
| <b>L03</b> Immunostimulants                        | 2 (1.8%)                    | 1 (1.0%)         | 3 (1.4%)           |
| <b>L04</b> Immunosuppressants                      | 0                           | 7 (6.9%)         | 7 (3.3%)           |
| <b>M01</b> Anti-inflamm. and antirheumatic prod.   | 3 (2.7%)                    | 6 (5.9%)         | 9 (4.3%)           |
| <b>M03</b> Muscle relaxants                        | 8 (7.2%)                    | 0                | 8 (3.8%)           |
| <b>M05</b> Drugs for treatment of bone diseases    | 1 (0.9%)                    | 2 (2.0%)         | 3 (1.4%)           |
| <b>N01</b> Anesthetics                             | 2 (1.8%)                    | 1 (1.0%)         | 3 (1.4%)           |
| <b>N02</b> Analgesics                              | 8 (7.2%)                    | 8 (7.9%)         | 16 (7.6%)          |
| <b>N03</b> Antiepileptics                          | 1 (0.9%)                    | 1 (1.0%)         | 2 (0.9%)           |
| <b>N04</b> Anti-parkinson drugs                    | 1 (0.9%)                    | 2 (2.0%)         | 3 (1.4%)           |
| <b>N05</b> Psycholeptics                           | 2 (1.8%)                    | 1 (1.0%)         | 3 (1.4%)           |
| <b>N06</b> Psychoanaleptics                        | 1 (0.9%)                    | 5 (5.0%)         | 6 (2.8%)           |
| <b>N07</b> Other nervous system drugs              | 4 (3.6%)                    | 4 (4.0%)         | 8 (3.8%)           |
| <b>R03</b> Drugs for obstructive airway diseases   | 2 (1.8%)                    | 3 (3.0%)         | 5 (2.4%)           |
| <b>R05</b> Cough and cold preparations             | 1 (0.9%)                    | 1 (1.0%)         | 2 (0.9%)           |
| <b>S01</b> Ophthalmologicals                       | 0                           | 1 (1.0%)         | 1 (0.5%)           |
| <b>V03</b> All other therapeutic products          | 1 (0.9%)                    | 0                | 1 (0.5%)           |
| <b>no drug</b>                                     | 12 (11%)                    | 0                | 12 (5.7%)          |

<sup>a</sup> A few UK cases involved multiple drugs
